# Supplementary material for: A 600 kyr reconstruction of deep Arctic seawater δ 18 O from benthic foraminiferal δ 18 O and ostracode Mg ∕ Ca paleothermometry
Source: Copernicus journal article supplement (doi:10.5194/cp-19-555-2023), 2023-03-14
Supplement: Supplementary file 1 [file cp-19-555-2023-supplement.zip]

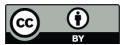

*Supplement of*

**A 600 kyr reconstruction of deep Arctic seawater  $\delta^{18}\text{O}$  from benthic foraminiferal  $\delta^{18}\text{O}$  and ostracode Mg / Ca paleothermometry**

**Jesse R. Farmer et al.**

*Correspondence to:* Jesse R. Farmer ([jesse.farmer@umb.edu](mailto:jesse.farmer@umb.edu))

- [cp-19-555-2023-supplement-title-page.pdf](#)
- [Farmer\\_Arctic\\_d18Osw\\_sourcedata.xlsx](#)

The copyright of individual parts of the supplement might differ from the article licence.
