# Supplementary material for: A 600 kyr reconstruction of deep Arctic seawater δ 18 O from benthic foraminiferal δ 18 O and ostracode Mg ∕ Ca paleothermometry
Source: Copernicus journal article supplement (doi:10.5194/cp-19-555-2023), 2023-03-14
Supplement: Supplementary file 2 [file cp-19-555-2023-supplement.zip]

Archive with 2 entries (2 files):
- cp-19-555-2023-supplement-title-page.pdf
- Farmer_Arctic_d18Osw_sourcedata.xlsx
